# Supplementary material for: Ongoing shuffling of protein fragments diversifies core viral functions to tackle bacterial resistance mechanisms
Source: Research Square preprint supplement (doi:10.21203/rs.3.rs-3053497/v1), 2023-06-21
Supplement: Supplementary file 1 [file e6dff9d100477ba2639c5759.xlsx]

## Sheet: TableS1
funct.orig	class.orig	no.seqs	no.phrogs	funct.new	class.new
HNH endonuclease	DNA, RNA and nucleotide metabolism	9830	125	endonuclease	DNA, RNA and nucleotide metabolism
exonuclease	DNA, RNA and nucleotide metabolism	5063	37	exonuclease	DNA, RNA and nucleotide metabolism
DNA helicase	DNA, RNA and nucleotide metabolism	4435	26	DNA helicase	DNA, RNA and nucleotide metabolism
DNA polymerase	DNA, RNA and nucleotide metabolism	3820	56	DNA polymerase	DNA, RNA and nucleotide metabolism
single strand DNA binding protein	DNA, RNA and nucleotide metabolism	3552	31	single strand DNA binding protein	DNA, RNA and nucleotide metabolism
replication initiation protein	DNA, RNA and nucleotide metabolism	3417	48	replication initiation protein	DNA, RNA and nucleotide metabolism
DNA primase	DNA, RNA and nucleotide metabolism	3335	44	DNA primase	DNA, RNA and nucleotide metabolism
RusA-like Holliday junction resolvase	DNA, RNA and nucleotide metabolism	3017	14	Holliday junction resolvase	DNA, RNA and nucleotide metabolism
DNA binding protein	DNA, RNA and nucleotide metabolism	2880	82	DNA binding protein	DNA, RNA and nucleotide metabolism
DnaB-like replicative helicase	DNA, RNA and nucleotide metabolism	2574	4	DNA helicase	DNA, RNA and nucleotide metabolism
endonuclease	DNA, RNA and nucleotide metabolism	2285	47	endonuclease	DNA, RNA and nucleotide metabolism
thioredoxin domain	DNA, RNA and nucleotide metabolism	1952	6	thioredoxin domain	DNA, RNA and nucleotide metabolism
HTH DNA binding protein	DNA, RNA and nucleotide metabolism	1919	56	DNA binding protein	DNA, RNA and nucleotide metabolism
thymidylate synthase	DNA, RNA and nucleotide metabolism	1774	15	thymidylate synthase	DNA, RNA and nucleotide metabolism
NinB/ Orf homologous recombination mediator	DNA, RNA and nucleotide metabolism	1505	3	recombination mediator	DNA, RNA and nucleotide metabolism
replication initiation O-like	DNA, RNA and nucleotide metabolism	1424	8	replication initiation protein	DNA, RNA and nucleotide metabolism
DnaC-like helicase loader	DNA, RNA and nucleotide metabolism	1350	3	DNA helicase loader	DNA, RNA and nucleotide metabolism
clamp loader of DNA polymerase	DNA, RNA and nucleotide metabolism	1139	8	clamp loader of DNA polymerase	DNA, RNA and nucleotide metabolism
Holliday junction resolvase	DNA, RNA and nucleotide metabolism	1135	13	Holliday junction resolvase	DNA, RNA and nucleotide metabolism
RecT-like ssDNA annealing protein	DNA, RNA and nucleotide metabolism	1111	8	DNA annealing protein	DNA, RNA and nucleotide metabolism
ParB-like partition protein	DNA, RNA and nucleotide metabolism	1071	17	partition protein	DNA, RNA and nucleotide metabolism
SbcC-like subunit of palindrome specific endonuclease	DNA, RNA and nucleotide metabolism	1071	1	palindrome specific endonuclease	DNA, RNA and nucleotide metabolism
endonuclease VII	DNA, RNA and nucleotide metabolism	1036	11	endonuclease	DNA, RNA and nucleotide metabolism
ribonucleoside diphosphate reductase small subunit	DNA, RNA and nucleotide metabolism	1010	3	ribonucleoside reductase	DNA, RNA and nucleotide metabolism
ribonucleoside-diphosphate reductase large subunit	DNA, RNA and nucleotide metabolism	1001	1	ribonucleoside reductase	DNA, RNA and nucleotide metabolism
nicking at origin of replication	DNA, RNA and nucleotide metabolism	969	1	nicking at origin of replication	DNA, RNA and nucleotide metabolism
SbcD-like subunit of palindrome specific endonuclease	DNA, RNA and nucleotide metabolism	893	1	palindrome specific endonuclease	DNA, RNA and nucleotide metabolism
DNA polymerase exonuclease subunit	DNA, RNA and nucleotide metabolism	876	3	DNA polymerase	DNA, RNA and nucleotide metabolism
Erf-like ssDNA annealing protein	DNA, RNA and nucleotide metabolism	854	6	DNA annealing protein	DNA, RNA and nucleotide metabolism
P-like helicase loader	DNA, RNA and nucleotide metabolism	843	1	DNA helicase loader	DNA, RNA and nucleotide metabolism
Mu Gam-like end protection	DNA, RNA and nucleotide metabolism	842	5	Mu Gam-like end protection	DNA, RNA and nucleotide metabolism
DnaD-like helicase loader	DNA, RNA and nucleotide metabolism	815	11	DNA helicase loader	DNA, RNA and nucleotide metabolism
Gp2.5-like ssDNA binding protein and ssDNA annealing protein	DNA, RNA and nucleotide metabolism	808	2	DNA binding/annealing protein	DNA, RNA and nucleotide metabolism
ATP-dependent DNA ligase	DNA, RNA and nucleotide metabolism	796	2	DNA ligase	DNA, RNA and nucleotide metabolism
Sak4-like ssDNA annealing protein	DNA, RNA and nucleotide metabolism	795	2	DNA annealing protein	DNA, RNA and nucleotide metabolism
DNA invertase	DNA, RNA and nucleotide metabolism	773	3	DNA invertase	DNA, RNA and nucleotide metabolism
homing endonuclease	DNA, RNA and nucleotide metabolism	741	13	endonuclease	DNA, RNA and nucleotide metabolism
dUTPase	DNA, RNA and nucleotide metabolism	705	3	dUTPase	DNA, RNA and nucleotide metabolism
RNA ligase	DNA, RNA and nucleotide metabolism	693	12	RNA ligase	DNA, RNA and nucleotide metabolism
Panton-Valentine leukocicin	DNA, RNA and nucleotide metabolism	683	2	Panton-Valentine leukocicin	DNA, RNA and nucleotide metabolism
DNA polymerase processivity factor	DNA, RNA and nucleotide metabolism	661	3	DNA polymerase processivity factor	DNA, RNA and nucleotide metabolism
dCMP deaminase	DNA, RNA and nucleotide metabolism	657	3	dCMP deaminase	DNA, RNA and nucleotide metabolism
RuvC-like Holliday junction resolvase	DNA, RNA and nucleotide metabolism	653	2	Holliday junction resolvase	DNA, RNA and nucleotide metabolism
NinG/ Rap DNA junction specific endonuclease	DNA, RNA and nucleotide metabolism	621	2	endonuclease	DNA, RNA and nucleotide metabolism
ParA-like partition protein	DNA, RNA and nucleotide metabolism	603	1	partition protein	DNA, RNA and nucleotide metabolism
nucleoside triphosphate pyrophosphohydrolase	DNA, RNA and nucleotide metabolism	593	1	nucleoside triphosphate pyrophosphohydrolase	DNA, RNA and nucleotide metabolism
RecA filament binding protein DinI	DNA, RNA and nucleotide metabolism	564	1	RecA filament binding protein DinI	DNA, RNA and nucleotide metabolism
RNA polymerase beta subunit	DNA, RNA and nucleotide metabolism	527	12	RNA polymerase	DNA, RNA and nucleotide metabolism
DNA polymerase/primase	DNA, RNA and nucleotide metabolism	514	12	DNA polymerase/primase	DNA, RNA and nucleotide metabolism
DNA primase/helicase	DNA, RNA and nucleotide metabolism	512	5	DNA primase/helicase	DNA, RNA and nucleotide metabolism
nucleotidyltransferase	DNA, RNA and nucleotide metabolism	498	8	nucleotidyltransferase	DNA, RNA and nucleotide metabolism
UvsY-like recombination mediator	DNA, RNA and nucleotide metabolism	493	1	Recombination mediator	DNA, RNA and nucleotide metabolism
Bet-like ssDNA annealing protein	DNA, RNA and nucleotide metabolism	475	1	DNA annealing protein	DNA, RNA and nucleotide metabolism
ribonucleotide reductase	DNA, RNA and nucleotide metabolism	455	11	ribonucleotide reductase	DNA, RNA and nucleotide metabolism
DNA endonuclease V	DNA, RNA and nucleotide metabolism	448	2	DNA endonuclease	DNA, RNA and nucleotide metabolism
DNA helicase loader	DNA, RNA and nucleotide metabolism	448	1	DNA helicase loader	DNA, RNA and nucleotide metabolism
nucleoside 2-deoxyribosyltransferase	DNA, RNA and nucleotide metabolism	434	2	nucleoside 2-deoxyribosyltransferase	DNA, RNA and nucleotide metabolism
RNA polymerase	DNA, RNA and nucleotide metabolism	431	11	RNA polymerase	DNA, RNA and nucleotide metabolism
dihydrofolate reductase	DNA, RNA and nucleotide metabolism	404	3	dihydrofolate reductase	DNA, RNA and nucleotide metabolism
Dda-like helicase	DNA, RNA and nucleotide metabolism	379	1	DNA helicase	DNA, RNA and nucleotide metabolism
ribonucleoside reductase class II	DNA, RNA and nucleotide metabolism	344	1	ribonucleoside reductase	DNA, RNA and nucleotide metabolism
Rnase H	DNA, RNA and nucleotide metabolism	340	6	Rnase H	DNA, RNA and nucleotide metabolism
RNA-binding protein	DNA, RNA and nucleotide metabolism	324	3	RNA-binding protein	DNA, RNA and nucleotide metabolism
RecE-like recombination exonuclease	DNA, RNA and nucleotide metabolism	314	2	exonuclease	DNA, RNA and nucleotide metabolism
exonuclease VIII	DNA, RNA and nucleotide metabolism	312	1	exonuclease	DNA, RNA and nucleotide metabolism
DNA end protector	DNA, RNA and nucleotide metabolism	300	1	DNA end protector	DNA, RNA and nucleotide metabolism
DNA topoisomerase II	DNA, RNA and nucleotide metabolism	277	5	DNA topoisomerase	DNA, RNA and nucleotide metabolism
partition protein	DNA, RNA and nucleotide metabolism	276	3	partition protein	DNA, RNA and nucleotide metabolism
replication protein	DNA, RNA and nucleotide metabolism	274	15	replication protein	DNA, RNA and nucleotide metabolism
nucleotide-sugar epimerase	DNA, RNA and nucleotide metabolism	254	1	nucleotide-sugar epimerase	DNA, RNA and nucleotide metabolism
DNA topoisomerase II large subunit	DNA, RNA and nucleotide metabolism	253	1	DNA topoisomerase	DNA, RNA and nucleotide metabolism
plasmid stability	DNA, RNA and nucleotide metabolism	244	1	plasmid stability	DNA, RNA and nucleotide metabolism
DNA ejection	DNA, RNA and nucleotide metabolism	235	2	DNA ejection	DNA, RNA and nucleotide metabolism
UmuD-like protein	DNA, RNA and nucleotide metabolism	229	3	UmuD-like protein	DNA, RNA and nucleotide metabolism
exonuclease VII	DNA, RNA and nucleotide metabolism	229	1	exonuclease	DNA, RNA and nucleotide metabolism
Sak-like ssDNA annealing protein	DNA, RNA and nucleotide metabolism	227	2	DNA annealing protein	DNA, RNA and nucleotide metabolism
anaerobic ribonucleotide reductase small subunit	DNA, RNA and nucleotide metabolism	224	1	ribonucleotide reductase	DNA, RNA and nucleotide metabolism
DNA repair exonuclease	DNA, RNA and nucleotide metabolism	219	3	exonuclease	DNA, RNA and nucleotide metabolism
Rnase E	DNA, RNA and nucleotide metabolism	217	1	Rnase E	DNA, RNA and nucleotide metabolism
DNA replication initiation	DNA, RNA and nucleotide metabolism	202	2	replication initiation protein	DNA, RNA and nucleotide metabolism
nuclease	DNA, RNA and nucleotide metabolism	199	10	nuclease	DNA, RNA and nucleotide metabolism
exonuclease recombination-associated	DNA, RNA and nucleotide metabolism	197	1	exonuclease recombination-associated	DNA, RNA and nucleotide metabolism
DprA-like DNA recombination-mediator protein	DNA, RNA and nucleotide metabolism	189	2	DprA-like DNA recombination-mediator protein	DNA, RNA and nucleotide metabolism
replication helicase	DNA, RNA and nucleotide metabolism	185	1	replication helicase	DNA, RNA and nucleotide metabolism
dATP / dGTP pyrophosphohydrolase	DNA, RNA and nucleotide metabolism	180	1	dATP / dGTP pyrophosphohydrolase	DNA, RNA and nucleotide metabolism
RNA polymerase ADP-ribosylase	DNA, RNA and nucleotide metabolism	174	1	RNA polymerase ADP-ribosylase	DNA, RNA and nucleotide metabolism
DNA binding domain	DNA, RNA and nucleotide metabolism	165	1	DNA binding protein	DNA, RNA and nucleotide metabolism
replication terminator	DNA, RNA and nucleotide metabolism	151	2	replication terminator	DNA, RNA and nucleotide metabolism
DNA polymerase III theta subunit	DNA, RNA and nucleotide metabolism	144	4	DNA polymerase	DNA, RNA and nucleotide metabolism
restriction alleviation ral	DNA, RNA and nucleotide metabolism	141	1	restriction alleviation ral	DNA, RNA and nucleotide metabolism
DNA ligase	DNA, RNA and nucleotide metabolism	139	12	DNA ligase	DNA, RNA and nucleotide metabolism
tRNA splicing ligase	DNA, RNA and nucleotide metabolism	139	1	tRNA splicing ligase	DNA, RNA and nucleotide metabolism
Ndd-like nucleoid disruption protein	DNA, RNA and nucleotide metabolism	136	1	Ndd-like nucleoid disruption protein	DNA, RNA and nucleotide metabolism
single strand annealing protein	DNA, RNA and nucleotide metabolism	132	3	DNA annealing protein	DNA, RNA and nucleotide metabolism
endonuclease V N-glycosylase UV repair enzyme	DNA, RNA and nucleotide metabolism	128	1	endonuclease	DNA, RNA and nucleotide metabolism
nucloid associated Lsr2-like	DNA, RNA and nucleotide metabolism	127	2	nucloid associated Lsr2-like	DNA, RNA and nucleotide metabolism
polymerase	DNA, RNA and nucleotide metabolism	126	8	polymerase	DNA, RNA and nucleotide metabolism
2-aminooxy adenylosuccinate synthetase	DNA, RNA and nucleotide metabolism	125	1	2-aminooxy adenylosuccinate synthetase	DNA, RNA and nucleotide metabolism
NAD-dependent DNA ligase	DNA, RNA and nucleotide metabolism	121	3	NAD-dependent DNA ligase	DNA, RNA and nucleotide metabolism
valyl tRNA synthetase modifier	DNA, RNA and nucleotide metabolism	121	2	valyl tRNA synthetase modifier	DNA, RNA and nucleotide metabolism
restriction endonuclease	DNA, RNA and nucleotide metabolism	117	5	endonuclease	DNA, RNA and nucleotide metabolism
RNA polymerase binding	DNA, RNA and nucleotide metabolism	116	1	RNA polymerase binding	DNA, RNA and nucleotide metabolism
RNA polymerase inhibitor	DNA, RNA and nucleotide metabolism	114	1	RNA polymerase inhibitor	DNA, RNA and nucleotide metabolism
endoribonuclease	DNA, RNA and nucleotide metabolism	113	1	endoribonuclease	DNA, RNA and nucleotide metabolism
helicase	DNA, RNA and nucleotide metabolism	112	12	helicase	DNA, RNA and nucleotide metabolism
DenB-like DNA endonuclease IV	DNA, RNA and nucleotide metabolism	109	1	endonuclease	DNA, RNA and nucleotide metabolism
primosomal protein	DNA, RNA and nucleotide metabolism	108	5	primosomal protein	DNA, RNA and nucleotide metabolism
Reverse transcriptase	DNA, RNA and nucleotide metabolism	104	1	Reverse transcriptase	DNA, RNA and nucleotide metabolism
DNA condensation	DNA, RNA and nucleotide metabolism	102	2	DNA condensation	DNA, RNA and nucleotide metabolism
tRNA amidotransferase	DNA, RNA and nucleotide metabolism	102	1	tRNA amidotransferase	DNA, RNA and nucleotide metabolism
helicase loader	DNA, RNA and nucleotide metabolism	93	2	DNA helicase loader	DNA, RNA and nucleotide metabolism
dCTP deaminase	DNA, RNA and nucleotide metabolism	90	1	dCTP deaminase	DNA, RNA and nucleotide metabolism
CRISPR/Cas system associated	DNA, RNA and nucleotide metabolism	89	2	CRISPR/Cas system associated	DNA, RNA and nucleotide metabolism
Cas4-domain exonuclease	DNA, RNA and nucleotide metabolism	76	1	Cas4-domain exonuclease	DNA, RNA and nucleotide metabolism
Sir2 (NAD-dependent deacetylase)	DNA, RNA and nucleotide metabolism	75	2	Sir2 (NAD-dependent deacetylase)	DNA, RNA and nucleotide metabolism
segregation and condensation complex subunit ScpB	DNA, RNA and nucleotide metabolism	75	2	segregation and condensation complex subunit ScpB	DNA, RNA and nucleotide metabolism
ribonucleotide reductase large subunit	DNA, RNA and nucleotide metabolism	74	3	ribonucleotide reductase	DNA, RNA and nucleotide metabolism
Dmd discriminator of mRNA degradation	DNA, RNA and nucleotide metabolism	72	1	Dmd discriminator of mRNA degradation	DNA, RNA and nucleotide metabolism
N4-like RNA polymerase	DNA, RNA and nucleotide metabolism	70	1	N4-like RNA polymerase	DNA, RNA and nucleotide metabolism
tRNA nucleotidyltransferase	DNA, RNA and nucleotide metabolism	70	2	tRNA nucleotidyltransferase	DNA, RNA and nucleotide metabolism
goF mRNA metabolism modulator	DNA, RNA and nucleotide metabolism	69	4	goF mRNA metabolism modulator	DNA, RNA and nucleotide metabolism
virion RNA polymerase	DNA, RNA and nucleotide metabolism	68	1	virion RNA polymerase	DNA, RNA and nucleotide metabolism
DNA endonuclease	DNA, RNA and nucleotide metabolism	65	1	endonuclease	DNA, RNA and nucleotide metabolism
Ref-like RecA filament endonuclease	DNA, RNA and nucleotide metabolism	65	1	Ref-like RecA filament endonuclease	DNA, RNA and nucleotide metabolism
DNA repair protein	DNA, RNA and nucleotide metabolism	62	6	DNA repair protein	DNA, RNA and nucleotide metabolism
Erf recombination cofactor Arf	DNA, RNA and nucleotide metabolism	60	1	Erf recombination cofactor Arf	DNA, RNA and nucleotide metabolism
replisome organizer	DNA, RNA and nucleotide metabolism	60	4	replisome organizer	DNA, RNA and nucleotide metabolism
RecJ-like ssDNA exonuclease	DNA, RNA and nucleotide metabolism	59	1	RecJ-like ssDNA exonuclease	DNA, RNA and nucleotide metabolism
ParB C-terminal domain	DNA, RNA and nucleotide metabolism	56	1	ParB C-terminal domain	DNA, RNA and nucleotide metabolism
regulator of chromosome condensation	DNA, RNA and nucleotide metabolism	54	3	regulator of chromosome condensation	DNA, RNA and nucleotide metabolism
dCMP hydroxymethylase	DNA, RNA and nucleotide metabolism	50	1	dCMP hydroxymethylase	DNA, RNA and nucleotide metabolism
Lsr2-like DNA bridging protein	DNA, RNA and nucleotide metabolism	48	3	Lsr2-like DNA bridging protein	DNA, RNA and nucleotide metabolism
Avd protein of DGR	DNA, RNA and nucleotide metabolism	45	1	Avd protein of DGR	DNA, RNA and nucleotide metabolism
replicative helicase-primase	DNA, RNA and nucleotide metabolism	45	1	replicative helicase-primase	DNA, RNA and nucleotide metabolism
ribonuclease	DNA, RNA and nucleotide metabolism	44	1	ribonuclease	DNA, RNA and nucleotide metabolism
rolling circle DNA replication initiation	DNA, RNA and nucleotide metabolism	42	1	replication initiation protein	DNA, RNA and nucleotide metabolism
ERCC4-type nuclease	DNA, RNA and nucleotide metabolism	41	1	ERCC4-type nuclease	DNA, RNA and nucleotide metabolism
anaerobic ribonucleoside reductase large subunit	DNA, RNA and nucleotide metabolism	41	4	ribonucleoside reductase	DNA, RNA and nucleotide metabolism
DNA sliding clamp inhibitor; arrest of S.aureus DNA synthesis	DNA, RNA and nucleotide metabolism	39	1	DNA sliding clamp inhibitor; arrest of S.aureus DNA synthesis	DNA, RNA and nucleotide metabolism
polarity suppression Psu-like by overcoming Rho	DNA, RNA and nucleotide metabolism	39	2	polarity suppression Psu-like by overcoming Rho	DNA, RNA and nucleotide metabolism
replication origin binding	DNA, RNA and nucleotide metabolism	39	1	replication origin binding	DNA, RNA and nucleotide metabolism
nucleoid associated protein	DNA, RNA and nucleotide metabolism	38	1	nucleoid associated protein	DNA, RNA and nucleotide metabolism
DnaA-like replication initiation protein	DNA, RNA and nucleotide metabolism	36	3	replication initiation protein	DNA, RNA and nucleotide metabolism
DNA ejection protein	DNA, RNA and nucleotide metabolism	35	2	DNA ejection protein	DNA, RNA and nucleotide metabolism
DNA topoisomerase	DNA, RNA and nucleotide metabolism	35	4	DNA topoisomerase	DNA, RNA and nucleotide metabolism
histone family DNA-binding	DNA, RNA and nucleotide metabolism	34	2	histone family DNA-binding	DNA, RNA and nucleotide metabolism
RNA replicase beta subunit	DNA, RNA and nucleotide metabolism	32	1	RNA replicase	DNA, RNA and nucleotide metabolism
RNA-dependent RNA polymerase	DNA, RNA and nucleotide metabolism	32	1	RNA polymerase	DNA, RNA and nucleotide metabolism
anti-restriction nuclease	DNA, RNA and nucleotide metabolism	31	1	anti-restriction nuclease	DNA, RNA and nucleotide metabolism
exonuclease V	DNA, RNA and nucleotide metabolism	31	1	exonuclease	DNA, RNA and nucleotide metabolism
replication	DNA, RNA and nucleotide metabolism	31	2	replication	DNA, RNA and nucleotide metabolism
ParB-like partition nuclease	DNA, RNA and nucleotide metabolism	30	7	ParB-like partition protein	DNA, RNA and nucleotide metabolism
ribonucleotide reductase class Ia beta subunit	DNA, RNA and nucleotide metabolism	30	3	ribonucleotide reductase	DNA, RNA and nucleotide metabolism
HTH DNA binding domain protein	DNA, RNA and nucleotide metabolism	29	1	DNA binding protein	DNA, RNA and nucleotide metabolism
histidyl tRNA synthetase	DNA, RNA and nucleotide metabolism	28	1	histidyl tRNA synthetase	DNA, RNA and nucleotide metabolism
nuclear shell protein	DNA, RNA and nucleotide metabolism	28	1	nuclear shell protein	DNA, RNA and nucleotide metabolism
ribonucleotide reductase alpha subunit	DNA, RNA and nucleotide metabolism	28	1	ribonucleotide reductase	DNA, RNA and nucleotide metabolism
tRNA-His guanylyltransferase	DNA, RNA and nucleotide metabolism	28	1	tRNA-His guanylyltransferase	DNA, RNA and nucleotide metabolism
tubulin PhuZ	DNA, RNA and nucleotide metabolism	28	1	tubulin PhuZ	DNA, RNA and nucleotide metabolism
Ku-like DNA end binding	DNA, RNA and nucleotide metabolism	27	1	Ku-like DNA end binding	DNA, RNA and nucleotide metabolism
homing endonuclease with GIY-YIG motif	DNA, RNA and nucleotide metabolism	27	2	homing endonuclease	DNA, RNA and nucleotide metabolism
primase	DNA, RNA and nucleotide metabolism	25	5	primase	DNA, RNA and nucleotide metabolism
RNA 2'-phosphotransferase	DNA, RNA and nucleotide metabolism	24	1	RNA 2'-phosphotransferase	DNA, RNA and nucleotide metabolism
nucleoside deoxyribosyltransferase	DNA, RNA and nucleotide metabolism	22	2	nucleoside deoxyribosyltransferase	DNA, RNA and nucleotide metabolism
DNA methylase	DNA, RNA and nucleotide metabolism	20	1	DNA methylase	DNA, RNA and nucleotide metabolism
DNA terminal protein	DNA, RNA and nucleotide metabolism	19	1	DNA terminal protein	DNA, RNA and nucleotide metabolism
dsDNA binding protein	DNA, RNA and nucleotide metabolism	19	1	DNA binding protein	DNA, RNA and nucleotide metabolism
replisome organizer DnaA-like	DNA, RNA and nucleotide metabolism	19	1	replisome organizer DnaA-like	DNA, RNA and nucleotide metabolism
GP16.7-like replication protein	DNA, RNA and nucleotide metabolism	18	1	GP16.7-like replication protein	DNA, RNA and nucleotide metabolism
Holliday junction branch migration helicase	DNA, RNA and nucleotide metabolism	17	1	Holliday junction branch migration helicase	DNA, RNA and nucleotide metabolism
dATP triphosphohydrolase	DNA, RNA and nucleotide metabolism	17	1	dATP triphosphohydrolase	DNA, RNA and nucleotide metabolism
RpbA RNA polymerase binding protein	DNA, RNA and nucleotide metabolism	16	1	RNA polymerase binding	DNA, RNA and nucleotide metabolism
intron encoded nuclease	DNA, RNA and nucleotide metabolism	16	1	intron encoded nuclease	DNA, RNA and nucleotide metabolism
ribonucleoside-diphosphate reductase beta subunit	DNA, RNA and nucleotide metabolism	15	1	ribonucleoside reductase	DNA, RNA and nucleotide metabolism
helicase subunit of the DNA excision repair complex	DNA, RNA and nucleotide metabolism	14	1	helicase subunit of the DNA excision repair complex	DNA, RNA and nucleotide metabolism
aerobic NDP reductase small subunit	DNA, RNA and nucleotide metabolism	13	1	aerobic NDP reductase small subunit	DNA, RNA and nucleotide metabolism
genome terminal protein	DNA, RNA and nucleotide metabolism	13	1	genome terminal protein	DNA, RNA and nucleotide metabolism
nucleotidase	DNA, RNA and nucleotide metabolism	13	1	nucleotidase	DNA, RNA and nucleotide metabolism
DNA repair photolyase	DNA, RNA and nucleotide metabolism	12	1	DNA repair photolyase	DNA, RNA and nucleotide metabolism
restriction endonuclease II	DNA, RNA and nucleotide metabolism	12	4	restriction endonuclease II	DNA, RNA and nucleotide metabolism
thymidylate synthase complementing protein	DNA, RNA and nucleotide metabolism	12	1	thymidylate synthase complementing protein	DNA, RNA and nucleotide metabolism
tyrosyl-tRNA synthetase	DNA, RNA and nucleotide metabolism	12	1	tyrosyl-tRNA synthetase	DNA, RNA and nucleotide metabolism
DNA polymerase I	DNA, RNA and nucleotide metabolism	11	2	DNA polymerase	DNA, RNA and nucleotide metabolism
RecX-like filament modulator	DNA, RNA and nucleotide metabolism	11	1	RecX-like filament modulator	DNA, RNA and nucleotide metabolism
replication initiation by nicking	DNA, RNA and nucleotide metabolism	11	1	replication initiation by nicking	DNA, RNA and nucleotide metabolism
deoxycytidinylate deaminase	DNA, RNA and nucleotide metabolism	9	2	dCMP deaminase	DNA, RNA and nucleotide metabolism
homing endonuclease with LAGLIDADG motif	DNA, RNA and nucleotide metabolism	9	1	endonuclease	DNA, RNA and nucleotide metabolism
intron-like DNA endonuclease	DNA, RNA and nucleotide metabolism	8	1	endonuclease	DNA, RNA and nucleotide metabolism
gpCom control of modification	DNA, RNA and nucleotide metabolism	7	1	gpCom control of modification	DNA, RNA and nucleotide metabolism
3'-5' exonuclease	DNA, RNA and nucleotide metabolism	5	2	exonuclease	DNA, RNA and nucleotide metabolism
DNA circularization	DNA, RNA and nucleotide metabolism	5	1	DNA circularization	DNA, RNA and nucleotide metabolism
alkylated DNA repair	DNA, RNA and nucleotide metabolism	4	1	alkylated DNA repair	DNA, RNA and nucleotide metabolism
anaerobic ribonucleoside reductase small subunit	DNA, RNA and nucleotide metabolism	4	1	ribonucleoside reductase	DNA, RNA and nucleotide metabolism
restriction enzyme III	DNA, RNA and nucleotide metabolism	3	1	restriction enzyme	DNA, RNA and nucleotide metabolism
restriction enzyme I	DNA, RNA and nucleotide metabolism	3	1	restriction enzyme	DNA, RNA and nucleotide metabolism
ribonucleotide reductase NrdA-like	DNA, RNA and nucleotide metabolism	3	1	ribonucleotide reductase	DNA, RNA and nucleotide metabolism
tRNA synthetase	DNA, RNA and nucleotide metabolism	3	2	tRNA synthetase	DNA, RNA and nucleotide metabolism
tRNA splicing ligase RtcB	DNA, RNA and nucleotide metabolism	2	1	tRNA splicing ligase RtcB	DNA, RNA and nucleotide metabolism
uracil-DNA glycosylase	DNA, RNA and nucleotide metabolism	2	1	uracil-DNA glycosylase	DNA, RNA and nucleotide metabolism
RNAse	DNA, RNA and nucleotide metabolism	1	1	RNAse	DNA, RNA and nucleotide metabolism
tail completion or Neck1 protein	connector	8526	10	tail completion	connector
tail terminator	connector	6281	15	tail terminator	connector
head-tail adaptor	connector	5403	25	adaptor	connector
head-tail adaptor Ad1	connector	5107	10	adaptor	connector
head closure Hc1	connector	4196	14	head closure	connector
head closure	connector	1904	6	head closure	connector
head-tail connector protein	connector	1029	31	HTJ	connector
head closure Hc2	connector	540	4	head closure	connector
head-tail adaptor Ad2	connector	512	1	adaptor	connector
neck protein	connector	446	9	tail completion	connector
head closure Hc3	connector	253	2	head closure	connector
head-tail adaptor Ad3	connector	221	1	adaptor	connector
upper collar connector	connector	74	1	upper collar connector	connector
neck passage structure	connector	63	1	neck passage	connector
tail completion	connector	52	2	tail completion	connector
adaptor Ad4	connector	45	1	adaptor	connector
pre-neck appendage protein	connector	33	2	pre-neck appendage protein	connector
head-tail joining	connector	22	1	HTJ	connector
neck passage structure protein	connector	14	1	neck passage	connector
appendage	connector	2	1	appendage	connector
neck protein Ne1	connector	1	1	tail completion	connector
terminase large subunit	head and packaging	13496	55	terminase large	head and packaging
portal protein	head and packaging	13467	51	portal	head and packaging
major head protein	head and packaging	12783	65	major capsid	head and packaging
terminase small subunit	head and packaging	10133	72	terminase small	head and packaging
virion structural protein	head and packaging	9492	411	structural protein	head and packaging
head maturation protease	head and packaging	7129	54	capsid assembly	head and packaging
head scaffolding protein	head and packaging	5122	42	scaffolding	head and packaging
minor head protein	head and packaging	3288	50	minor capsid	head and packaging
head decoration	head and packaging	2477	12	capsid decoration	head and packaging
head protein	head and packaging	2039	43	capsid	head and packaging
head morphogenesis	head and packaging	1924	22	capsid assembly	head and packaging
internal virion protein	head and packaging	1553	21	internal virion protein	head and packaging
structural protein	head and packaging	968	10	structural protein	head and packaging
DNA packaging chaperone FI	head and packaging	959	1	capsid assembly	head and packaging
minor head protein and DNA pilot	head and packaging	546	3	minor capsid	head and packaging
structural protein with Ig domain	head and packaging	510	1	structural protein	head and packaging
minor head protein Ace-like	head and packaging	397	1	minor capsid	head and packaging
internal virion protein with endolysin domain	head and packaging	360	1	internal virion protein	head and packaging
terminase	head and packaging	344	12	terminase	head and packaging
endolysin	head and packaging	338	3	endolysin	lysis
Hoc-like head decoration	head and packaging	278	8	capsid decoration	head and packaging
internal head protein	head and packaging	228	8	internal virion protein	head and packaging
prohead	head and packaging	153	4	prohead	head and packaging
head vertex assembly chaperone	head and packaging	149	2	capsid assembly	head and packaging
assembly (protein IV of M13)	head and packaging	147	1	capsid assembly	head and packaging
head assembly	head and packaging	142	2	capsid assembly	head and packaging
minor head protein inhibitor of protease	head and packaging	142	1	minor capsid	head and packaging
PmgG-like head morphogenesis	head and packaging	134	1	capsid assembly	head and packaging
minor coat protein	head and packaging	116	3	minor capsid	head and packaging
major coat protein	head and packaging	109	2	major capsid	head and packaging
major spike protein	head and packaging	108	2	capsid decoration	head and packaging
PmgS-like head morphogenesis	head and packaging	90	1	capsid assembly	head and packaging
morphogenesis (protein I of M13)	head and packaging	90	1	capsid assembly	head and packaging
minor head protein; receptor binding	head and packaging	88	1	minor capsid	head and packaging
PmgB-like head morphogenesis	head and packaging	82	1	capsid assembly	head and packaging
PmgC-like head morphogenesis	head and packaging	82	1	capsid assembly	head and packaging
head fiber protein	head and packaging	80	5	capsid decoration	head and packaging
internal virion lysozyme motif	head and packaging	72	1	internal virion protein	head and packaging
head decoration protein	head and packaging	47	1	capsid decoration	head and packaging
major capsid protein	head and packaging	43	1	major capsid	head and packaging
scaffolding protein	head and packaging	34	1	scaffolding	head and packaging
major head and protease protein	head and packaging	31	2	major capsid	head and packaging
head closure Hc1	head and packaging	24	1	head closure	connector
spore coat protein	head and packaging	17	1	spore coat protein	head and packaging
attachment protein	head and packaging	13	1	attachment protein	head and packaging
prohead protease inhibitor	head and packaging	13	1	capsid assembly	head and packaging
pyramid forming protein	head and packaging	13	1	pyramid forming protein	head and packaging
tail tip protein Tal	head and packaging	4	1	tail tip protein Tal	tail
coat protein	head and packaging	3	3	capsid	head and packaging
integrase	integration and excision	7482	21	integrase	integration and excision
transposase	integration and excision	4281	43	transposase	integration and excision
excisionase	integration and excision	1675	28	excisionase	integration and excision
excisionase and transcriptional regulator	integration and excision	1257	6	excisionase	integration and excision
site-specific recombination directionality factor RDF	integration and excision	830	4	recombination directionality factor	integration and excision
Cox-like excisionase and repressor	integration and excision	686	2	excisionase	integration and excision
DNA transposition protein	integration and excision	415	1	DNA transposition protein	integration and excision
recombination directionality factor	integration and excision	66	4	recombination directionality factor	integration and excision
endolysin	lysis	12809	116	endolysin	lysis
holin	lysis	9018	101	holin/anti-holin	lysis
Rz-like spanin	lysis	6543	56	spanin	lysis
holin/anti-holin	lysis	781	5	holin/anti-holin	lysis
amidase	lysis	455	10	amidase	lysis
RIIB lysis inhibitor	lysis	327	5	lysis inhibition	lysis
RIIA lysis inhibitor	lysis	322	6	lysis inhibition	lysis
lysis inhibition	lysis	131	2	lysis inhibition	lysis
lysM motif protein	lysis	120	2	endolysin	lysis
lysis inhibition; accessory protein	lysis	104	2	lysis inhibition	lysis
endolysin; inhibits RNA polymerase	lysis	97	3	endolysin	lysis
endolysin; lysM motif	lysis	80	1	endolysin	lysis
lysis determining protein	lysis	80	1	lysis determining protein	lysis
spanin	lysis	44	1	spanin	lysis
lysozyme domain-containing protein	lysis	32	1	lysozyme	lysis
i-spanin	lysis	15	1	spanin	lysis
cysteine protease	lysis	13	1	cysteine protease	lysis
membrane protein	moron, auxiliary metabolic gene and host takeover	2287	166	membrane protein	moron, auxiliary metabolic gene and host takeover
2OG-Fe(II) oxygenase	moron, auxiliary metabolic gene and host takeover	2207	2	2OG-Fe(II) oxygenase	moron, auxiliary metabolic gene and host takeover
glycosyltransferase	moron, auxiliary metabolic gene and host takeover	715	34	glycosyltransferase	moron, auxiliary metabolic gene and host takeover
Ren-like exclusion protein	moron, auxiliary metabolic gene and host takeover	682	2	Ren-like exclusion protein	moron, auxiliary metabolic gene and host takeover
gam-like host nuclease inhibitor	moron, auxiliary metabolic gene and host takeover	607	2	gam-like host nuclease inhibitor	moron, auxiliary metabolic gene and host takeover
photosystem II D1	moron, auxiliary metabolic gene and host takeover	577	2	photosystem II D1	moron, auxiliary metabolic gene and host takeover
Zot-like toxin	moron, auxiliary metabolic gene and host takeover	537	1	Zot-like toxin	moron, auxiliary metabolic gene and host takeover
ABC transporter	moron, auxiliary metabolic gene and host takeover	510	7	ABC transporter	moron, auxiliary metabolic gene and host takeover
toxin	moron, auxiliary metabolic gene and host takeover	485	14	toxin	moron, auxiliary metabolic gene and host takeover
MokW-like host killing	moron, auxiliary metabolic gene and host takeover	476	1	MokW-like host killing	moron, auxiliary metabolic gene and host takeover
porphyrin biosynthesis	moron, auxiliary metabolic gene and host takeover	476	1	porphyrin biosynthesis	moron, auxiliary metabolic gene and host takeover
PAAR motif of membran proteins	moron, auxiliary metabolic gene and host takeover	441	1	PAAR motif of membran proteins	moron, auxiliary metabolic gene and host takeover
phosphoadenosine phosphosulfate reductase	moron, auxiliary metabolic gene and host takeover	378	4	phosphoadenosine phosphosulfate reductase	moron, auxiliary metabolic gene and host takeover
Phd-like antitoxin	moron, auxiliary metabolic gene and host takeover	334	1	Phd-like antitoxin	moron, auxiliary metabolic gene and host takeover
membrane associated protein	moron, auxiliary metabolic gene and host takeover	334	7	membrane associated protein	moron, auxiliary metabolic gene and host takeover
Lar-like restriction alleviation protein	moron, auxiliary metabolic gene and host takeover	332	6	Lar-like restriction alleviation protein	moron, auxiliary metabolic gene and host takeover
queuine tRNA-ribosyltransferase	moron, auxiliary metabolic gene and host takeover	317	4	queuine tRNA-ribosyltransferase	moron, auxiliary metabolic gene and host takeover
host nuclease inhibitor	moron, auxiliary metabolic gene and host takeover	283	3	host nuclease inhibitor	moron, auxiliary metabolic gene and host takeover
CpeT-like antenna protein	moron, auxiliary metabolic gene and host takeover	277	1	CpeT-like antenna protein	moron, auxiliary metabolic gene and host takeover
NrdD-like anaerobic ribonucleotide reductase large subunit	moron, auxiliary metabolic gene and host takeover	277	1	ribonucleotide reductase	DNA, RNA and nucleotide metabolism
toxin-antitoxin system HicB-like	moron, auxiliary metabolic gene and host takeover	274	1	HicB-like antitoxin	moron, auxiliary metabolic gene and host takeover
anti-sigma factor	moron, auxiliary metabolic gene and host takeover	268	2	anti-sigma factor	moron, auxiliary metabolic gene and host takeover
ferredoxin	moron, auxiliary metabolic gene and host takeover	250	5	ferredoxin	moron, auxiliary metabolic gene and host takeover
tellurite resistance	moron, auxiliary metabolic gene and host takeover	245	3	tellurite resistance	moron, auxiliary metabolic gene and host takeover
Doc-like toxin	moron, auxiliary metabolic gene and host takeover	239	1	Doc-like toxin	moron, auxiliary metabolic gene and host takeover
glucosyltransferase	moron, auxiliary metabolic gene and host takeover	224	3	glucosyltransferase	moron, auxiliary metabolic gene and host takeover
abc2 anti-RecBCD	moron, auxiliary metabolic gene and host takeover	215	1	abc2 anti-RecBCD	moron, auxiliary metabolic gene and host takeover
host range and adsorption protein	moron, auxiliary metabolic gene and host takeover	212	7	host range and adsorption protein	moron, auxiliary metabolic gene and host takeover
Alt-like RNA polymerase ADP-ribosyltransferase	moron, auxiliary metabolic gene and host takeover	196	4	ADP-ribosyltransferase	moron, auxiliary metabolic gene and host takeover
antitoxin from a toxin-antitoxin system	moron, auxiliary metabolic gene and host takeover	190	7	antitoxin from a toxin-antitoxin system	moron, auxiliary metabolic gene and host takeover
QueC-like queuosine biosynthesis	moron, auxiliary metabolic gene and host takeover	182	2	QueC-like queuosine biosynthesis	moron, auxiliary metabolic gene and host takeover
cell division inhibitor	moron, auxiliary metabolic gene and host takeover	178	2	cell division inhibitor	moron, auxiliary metabolic gene and host takeover
GtrB-like O-antigen conversion	moron, auxiliary metabolic gene and host takeover	175	2	GtrB-like O-antigen conversion	moron, auxiliary metabolic gene and host takeover
FtsK/SpoIIIE-like protein	moron, auxiliary metabolic gene and host takeover	171	6	FtsK/SpoIIIE-like protein	moron, auxiliary metabolic gene and host takeover
Shiga toxin subunit B	moron, auxiliary metabolic gene and host takeover	170	1	Shiga toxin	moron, auxiliary metabolic gene and host takeover
Shiga toxin subunit A	moron, auxiliary metabolic gene and host takeover	169	2	Shiga toxin	moron, auxiliary metabolic gene and host takeover
ABC transporter ATP-binding subunit	moron, auxiliary metabolic gene and host takeover	163	1	ABC transporter ATP-binding subunit	moron, auxiliary metabolic gene and host takeover
flavodoxin	moron, auxiliary metabolic gene and host takeover	163	1	flavodoxin	moron, auxiliary metabolic gene and host takeover
RstB sensor of two protein system	moron, auxiliary metabolic gene and host takeover	158	1	RstB sensor of two protein system	moron, auxiliary metabolic gene and host takeover
involved in bacteriocin production or immunity	moron, auxiliary metabolic gene and host takeover	153	2	involved in bacteriocin production or immunity	moron, auxiliary metabolic gene and host takeover
CTXphi Zot-like toxin	moron, auxiliary metabolic gene and host takeover	143	1	Zot-like toxin	moron, auxiliary metabolic gene and host takeover
immunity to superinfection	moron, auxiliary metabolic gene and host takeover	143	1	superinfection exclusion	moron, auxiliary metabolic gene and host takeover
RelE-like toxin	moron, auxiliary metabolic gene and host takeover	140	2	RelE-like toxin	moron, auxiliary metabolic gene and host takeover
galactosyl transferase	moron, auxiliary metabolic gene and host takeover	136	3	galactosyl transferase	moron, auxiliary metabolic gene and host takeover
Cor superinfection exclusion protein	moron, auxiliary metabolic gene and host takeover	134	1	superinfection exclusion	moron, auxiliary metabolic gene and host takeover
core encoded pilin	moron, auxiliary metabolic gene and host takeover	134	1	core encoded pilin	moron, auxiliary metabolic gene and host takeover
phosphoribosylaminoimidazole-succinocarboxamide synthase	moron, auxiliary metabolic gene and host takeover	134	1	phosphoribosylaminoimidazole-succinocarboxamide synthase	moron, auxiliary metabolic gene and host takeover
enoyl-CoA hydratase/carnithine racemase-like	moron, auxiliary metabolic gene and host takeover	133	1	enoyl-CoA hydratase/carnithine racemase-like	moron, auxiliary metabolic gene and host takeover
superinfection exclusion	moron, auxiliary metabolic gene and host takeover	132	3	superinfection exclusion	moron, auxiliary metabolic gene and host takeover
phosphoribosylaminoimidazole synthetase	moron, auxiliary metabolic gene and host takeover	125	1	phosphoribosylaminoimidazole synthetase	moron, auxiliary metabolic gene and host takeover
phosphoheptose isomerase	moron, auxiliary metabolic gene and host takeover	121	1	phosphoheptose isomerase	moron, auxiliary metabolic gene and host takeover
ribosome associated inhibitor A; zinc finger domain	moron, auxiliary metabolic gene and host takeover	119	1	ribosome associated inhibitor A; zinc finger domain	moron, auxiliary metabolic gene and host takeover
5-phosphoribosylformylglycinamide amidotransferase	moron, auxiliary metabolic gene and host takeover	116	1	5-phosphoribosylformylglycinamide amidotransferase	moron, auxiliary metabolic gene and host takeover
anti-restriction protein	moron, auxiliary metabolic gene and host takeover	115	6	anti-restriction protein	moron, auxiliary metabolic gene and host takeover
superinfection exclusion; inhibits SieB	moron, auxiliary metabolic gene and host takeover	114	1	superinfection exclusion	moron, auxiliary metabolic gene and host takeover
cef modifier of supressor tRNAs	moron, auxiliary metabolic gene and host takeover	110	1	cef modifier of supressor tRNAs	moron, auxiliary metabolic gene and host takeover
plasmid antitoxin with HTH domain	moron, auxiliary metabolic gene and host takeover	109	2	plasmid antitoxin with HTH domain	moron, auxiliary metabolic gene and host takeover
quaternary ammonium compound-resistance protein QacE	moron, auxiliary metabolic gene and host takeover	107	1	quaternary ammonium compound-resistance protein QacE	moron, auxiliary metabolic gene and host takeover
Srd anti-sigma factor	moron, auxiliary metabolic gene and host takeover	106	1	Srd anti-sigma factor	moron, auxiliary metabolic gene and host takeover
antitoxin mazE-like	moron, auxiliary metabolic gene and host takeover	105	1	antitoxin mazE-like	moron, auxiliary metabolic gene and host takeover
Gp5.5-like host HNS inhibition	moron, auxiliary metabolic gene and host takeover	103	1	Gp5.5-like host HNS inhibition	moron, auxiliary metabolic gene and host takeover
TciB-like inhibition of cell division or resistance to colicin	moron, auxiliary metabolic gene and host takeover	102	1	TciB-like inhibition of cell division or resistance to colicin	moron, auxiliary metabolic gene and host takeover
MazF-like growth inhibitor	moron, auxiliary metabolic gene and host takeover	99	4	MazF-like growth inhibitor	moron, auxiliary metabolic gene and host takeover
Nol-like carbamoyltransferase	moron, auxiliary metabolic gene and host takeover	97	2	Nol-like carbamoyltransferase	moron, auxiliary metabolic gene and host takeover
Hdf-like antirestriction	moron, auxiliary metabolic gene and host takeover	92	1	Hdf-like antirestriction	moron, auxiliary metabolic gene and host takeover
Ulx-like anti-restriction	moron, auxiliary metabolic gene and host takeover	92	1	Ulx-like anti-restriction	moron, auxiliary metabolic gene and host takeover
ferrochelatase	moron, auxiliary metabolic gene and host takeover	89	2	ferrochelatase	moron, auxiliary metabolic gene and host takeover
enterotoxin type A / speL	moron, auxiliary metabolic gene and host takeover	86	1	enterotoxin type A / speL	moron, auxiliary metabolic gene and host takeover
Abi alpha-like abortive infection mechanism	moron, auxiliary metabolic gene and host takeover	82	1	Abi alpha-like abortive infection mechanism	moron, auxiliary metabolic gene and host takeover
DdrA-like anti-restriction protein	moron, auxiliary metabolic gene and host takeover	82	1	DdrA-like anti-restriction protein	moron, auxiliary metabolic gene and host takeover
enterotoxin CtxA	moron, auxiliary metabolic gene and host takeover	81	1	enterotoxin CtxA	moron, auxiliary metabolic gene and host takeover
PnuC-like nicotinamide mononucleotide transport	moron, auxiliary metabolic gene and host takeover	80	1	PnuC-like nicotinamide mononucleotide transport	moron, auxiliary metabolic gene and host takeover
mobile element MPME	moron, auxiliary metabolic gene and host takeover	80	1	mobile element MPME	moron, auxiliary metabolic gene and host takeover
superoxide dismutase precursor	moron, auxiliary metabolic gene and host takeover	77	1	superoxide dismutase precursor	moron, auxiliary metabolic gene and host takeover
enterotoxin CtxB	moron, auxiliary metabolic gene and host takeover	74	1	enterotoxin CtxB	moron, auxiliary metabolic gene and host takeover
QueE-like radical SAM domain	moron, auxiliary metabolic gene and host takeover	73	1	QueE-like radical SAM domain	moron, auxiliary metabolic gene and host takeover
abortive infection resistance protein	moron, auxiliary metabolic gene and host takeover	70	1	abortive infection resistance protein	moron, auxiliary metabolic gene and host takeover
GtrA-like O-antigen conversion	moron, auxiliary metabolic gene and host takeover	68	1	GtrA-like O-antigen conversion	moron, auxiliary metabolic gene and host takeover
QueD-like 6-pyruvoyl-tetrahydropterin synthase	moron, auxiliary metabolic gene and host takeover	62	1	QueD-like 6-pyruvoyl-tetrahydropterin synthase	moron, auxiliary metabolic gene and host takeover
decoy of host sigma32	moron, auxiliary metabolic gene and host takeover	60	1	decoy of host sigma32	moron, auxiliary metabolic gene and host takeover
gamma-glutamyl cyclotransferase	moron, auxiliary metabolic gene and host takeover	58	1	gamma-glutamyl cyclotransferase	moron, auxiliary metabolic gene and host takeover
ocr-like anti-restriction	moron, auxiliary metabolic gene and host takeover	57	1	ocr-like anti-restriction	moron, auxiliary metabolic gene and host takeover
ribosomal protein S6 glutaminyl transferase	moron, auxiliary metabolic gene and host takeover	56	1	ribosomal protein S6 glutaminyl transferase	moron, auxiliary metabolic gene and host takeover
5'-3' deoxyribonucleotidase	moron, auxiliary metabolic gene and host takeover	54	1	5'-3' deoxyribonucleotidase	moron, auxiliary metabolic gene and host takeover
acyl carrier protein	moron, auxiliary metabolic gene and host takeover	54	2	acyl carrier protein	moron, auxiliary metabolic gene and host takeover
host RecBCD nuclease inhibitor	moron, auxiliary metabolic gene and host takeover	47	2	host RecBCD nuclease inhibitor	moron, auxiliary metabolic gene and host takeover
toxin of TA system	moron, auxiliary metabolic gene and host takeover	47	1	toxin of TA system	moron, auxiliary metabolic gene and host takeover
FabG-like 3-oxoacyl-(acyl-carrier-protein) reductase	moron, auxiliary metabolic gene and host takeover	46	1	FabG-like 3-oxoacyl-(acyl-carrier-protein) reductase	moron, auxiliary metabolic gene and host takeover
inhibitor of MrcBC restriction	moron, auxiliary metabolic gene and host takeover	46	1	inhibitor of MrcBC restriction	moron, auxiliary metabolic gene and host takeover
Galactose-3-O-sulfotransferase	moron, auxiliary metabolic gene and host takeover	43	1	Galactose-3-O-sulfotransferase	moron, auxiliary metabolic gene and host takeover
pilin	moron, auxiliary metabolic gene and host takeover	42	1	pilin	moron, auxiliary metabolic gene and host takeover
nicotinamide-nucleotide adenylyltransferase	moron, auxiliary metabolic gene and host takeover	41	1	nicotinamide-nucleotide adenylyltransferase	moron, auxiliary metabolic gene and host takeover
GtrC-like O-antigen conversion translocase	moron, auxiliary metabolic gene and host takeover	40	3	GtrC-like O-antigen conversion translocase	moron, auxiliary metabolic gene and host takeover
antimicrobial peptide resistance and lipid A acylation protein PagP	moron, auxiliary metabolic gene and host takeover	40	1	antimicrobial peptide resistance and lipid A acylation protein PagP	moron, auxiliary metabolic gene and host takeover
membrane-flanked domain	moron, auxiliary metabolic gene and host takeover	39	1	membrane-flanked domain	moron, auxiliary metabolic gene and host takeover
NrdA-like aerobic NDP reductase large subunit	moron, auxiliary metabolic gene and host takeover	37	1	NrdA-like aerobic NDP reductase large subunit	moron, auxiliary metabolic gene and host takeover
ribulose-1;5-bisphosphate carboxylase/oxygenase small subunit	moron, auxiliary metabolic gene and host takeover	37	1	ribulose-1;5-bisphosphate carboxylase/oxygenase small subunit	moron, auxiliary metabolic gene and host takeover
ADP-ribosyltransferase exoenzyme toxin	moron, auxiliary metabolic gene and host takeover	36	1	ADP-ribosyltransferase	moron, auxiliary metabolic gene and host takeover
PAGK virulence factor	moron, auxiliary metabolic gene and host takeover	34	1	PAGK virulence factor	moron, auxiliary metabolic gene and host takeover
endonuclease nicking abasic sites generated by host uracil glycosylase Ung	moron, auxiliary metabolic gene and host takeover	33	1	endonuclease nicking abasic sites generated by host uracil glycosylase Ung	moron, auxiliary metabolic gene and host takeover
plastoquinol terminal oxidase	moron, auxiliary metabolic gene and host takeover	33	1	plastoquinol terminal oxidase	moron, auxiliary metabolic gene and host takeover
acyl-CoA N-acyltransferase	moron, auxiliary metabolic gene and host takeover	31	1	acyl-CoA N-acyltransferase	moron, auxiliary metabolic gene and host takeover
ribonuclease toxin of AT system	moron, auxiliary metabolic gene and host takeover	31	1	ribonuclease toxin of AT system	moron, auxiliary metabolic gene and host takeover
decoy of host sigma70	moron, auxiliary metabolic gene and host takeover	29	1	decoy of host sigma70	moron, auxiliary metabolic gene and host takeover
quinone oxidoreductase TQO	moron, auxiliary metabolic gene and host takeover	29	1	quinone oxidoreductase TQO	moron, auxiliary metabolic gene and host takeover
HicB-like antitoxin	moron, auxiliary metabolic gene and host takeover	26	2	HicB-like antitoxin	moron, auxiliary metabolic gene and host takeover
phospho-2-dehydro-3-deoxyheptonate aldolase	moron, auxiliary metabolic gene and host takeover	26	1	phospho-2-dehydro-3-deoxyheptonate aldolase	moron, auxiliary metabolic gene and host takeover
cobalamin biosynthesis protein	moron, auxiliary metabolic gene and host takeover	24	1	cobalamin biosynthesis protein	moron, auxiliary metabolic gene and host takeover
phosphate transporter subunit	moron, auxiliary metabolic gene and host takeover	24	1	phosphate transporter subunit	moron, auxiliary metabolic gene and host takeover
arabinose 5-phosphate isomerase	moron, auxiliary metabolic gene and host takeover	23	1	arabinose 5-phosphate isomerase	moron, auxiliary metabolic gene and host takeover
glutamine amidotransferase	moron, auxiliary metabolic gene and host takeover	23	2	glutamine amidotransferase	moron, auxiliary metabolic gene and host takeover
SieB superinfection exclusion	moron, auxiliary metabolic gene and host takeover	21	2	superinfection exclusion	moron, auxiliary metabolic gene and host takeover
cytolethal distending toxin B subunit	moron, auxiliary metabolic gene and host takeover	21	1	cytolethal distending toxin	moron, auxiliary metabolic gene and host takeover
MIT family metal ion transporter	moron, auxiliary metabolic gene and host takeover	20	1	MIT family metal ion transporter	moron, auxiliary metabolic gene and host takeover
beta-lactamase-inhibitor protein BLIP	moron, auxiliary metabolic gene and host takeover	20	1	beta-lactamase-inhibitor protein BLIP	moron, auxiliary metabolic gene and host takeover
colanic acid degradation	moron, auxiliary metabolic gene and host takeover	20	1	colanic acid degradation	moron, auxiliary metabolic gene and host takeover
glutathionylspermidine synthase	moron, auxiliary metabolic gene and host takeover	20	1	glutathionylspermidine synthase	moron, auxiliary metabolic gene and host takeover
lipase	moron, auxiliary metabolic gene and host takeover	20	1	lipase	moron, auxiliary metabolic gene and host takeover
BstA abortive infection system, replication inhibitor	moron, auxiliary metabolic gene and host takeover	19	1	BstA abortive infection system, replication inhibitor	moron, auxiliary metabolic gene and host takeover
O-antigen acetylase	moron, auxiliary metabolic gene and host takeover	18	1	O-antigen acetylase	moron, auxiliary metabolic gene and host takeover
T3SS effector protein EspN	moron, auxiliary metabolic gene and host takeover	18	1	T3SS effector protein EspN	moron, auxiliary metabolic gene and host takeover
T3SS secreted effector Ibe	moron, auxiliary metabolic gene and host takeover	18	1	T3SS secreted effector Ibe	moron, auxiliary metabolic gene and host takeover
cytolethal distending toxin C subunit	moron, auxiliary metabolic gene and host takeover	18	1	cytolethal distending toxin	moron, auxiliary metabolic gene and host takeover
activator of host PrrC lysyl-tRNA endonuclease	moron, auxiliary metabolic gene and host takeover	17	1	activator of host PrrC lysyl-tRNA endonuclease	moron, auxiliary metabolic gene and host takeover
chemotaxis inhibition protein	moron, auxiliary metabolic gene and host takeover	17	1	chemotaxis inhibition protein	moron, auxiliary metabolic gene and host takeover
cation efflux protein	moron, auxiliary metabolic gene and host takeover	16	1	cation efflux protein	moron, auxiliary metabolic gene and host takeover
ferredoxin oxidoreductase	moron, auxiliary metabolic gene and host takeover	16	1	ferredoxin oxidoreductase	moron, auxiliary metabolic gene and host takeover
polysaccharide chain length determinant protein	moron, auxiliary metabolic gene and host takeover	16	1	polysaccharide chain length determinant protein	moron, auxiliary metabolic gene and host takeover
sporulation protein	moron, auxiliary metabolic gene and host takeover	16	3	sporulation protein	moron, auxiliary metabolic gene and host takeover
dimethyl sulfoxide reductase DmsA	moron, auxiliary metabolic gene and host takeover	15	1	dimethyl sulfoxide reductase DmsA	moron, auxiliary metabolic gene and host takeover
superinfection exclusion SieA-like	moron, auxiliary metabolic gene and host takeover	15	1	superinfection exclusion	moron, auxiliary metabolic gene and host takeover
beta-glucosyltransferase	moron, auxiliary metabolic gene and host takeover	14	1	beta-glucosyltransferase	moron, auxiliary metabolic gene and host takeover
membrane DNA delivery	moron, auxiliary metabolic gene and host takeover	14	1	membrane DNA delivery	moron, auxiliary metabolic gene and host takeover
NifU-like Fe-S cluster assembly protein	moron, auxiliary metabolic gene and host takeover	13	1	NifU-like Fe-S cluster assembly protein	moron, auxiliary metabolic gene and host takeover
PufC cytochrome	moron, auxiliary metabolic gene and host takeover	13	1	PufC cytochrome	moron, auxiliary metabolic gene and host takeover
dTDP-4-dehydrorhamnose 3,5-epimerase	moron, auxiliary metabolic gene and host takeover	13	1	dTDP-4-dehydrorhamnose 3,5-epimerase	moron, auxiliary metabolic gene and host takeover
flagellar protein	moron, auxiliary metabolic gene and host takeover	13	1	flagellar protein	moron, auxiliary metabolic gene and host takeover
superinfection exclusion Sie-like	moron, auxiliary metabolic gene and host takeover	13	1	superinfection exclusion	moron, auxiliary metabolic gene and host takeover
type I-E anti-CRISPR protein	moron, auxiliary metabolic gene and host takeover	13	1	type I-E anti-CRISPR protein	moron, auxiliary metabolic gene and host takeover
Gp5.9-like inihibitor of recBCD nuclease	moron, auxiliary metabolic gene and host takeover	12	1	Gp5.9-like inihibitor of recBCD nuclease	moron, auxiliary metabolic gene and host takeover
PufA cytochrome subunit	moron, auxiliary metabolic gene and host takeover	12	1	PufA cytochrome subunit	moron, auxiliary metabolic gene and host takeover
PufB cytochrome subunit	moron, auxiliary metabolic gene and host takeover	12	1	PufB cytochrome subunit	moron, auxiliary metabolic gene and host takeover
cyanobacterial phosphoribosylglycinamide formyltransferase	moron, auxiliary metabolic gene and host takeover	12	1	cyanobacterial phosphoribosylglycinamide formyltransferase	moron, auxiliary metabolic gene and host takeover
cytolethal distending toxin A subunit	moron, auxiliary metabolic gene and host takeover	12	1	cytolethal distending toxin	moron, auxiliary metabolic gene and host takeover
pectate lyase	moron, auxiliary metabolic gene and host takeover	12	2	pectate lyase	moron, auxiliary metabolic gene and host takeover
stringent starvation protein Sspb-like	moron, auxiliary metabolic gene and host takeover	12	1	stringent starvation protein Sspb-like	moron, auxiliary metabolic gene and host takeover
NrdC-like thioredoxin	moron, auxiliary metabolic gene and host takeover	11	1	NrdC-like thioredoxin	moron, auxiliary metabolic gene and host takeover
type I-F anti-CRISPR protein	moron, auxiliary metabolic gene and host takeover	11	1	type I-F anti-CRISPR protein	moron, auxiliary metabolic gene and host takeover
DarB-like antirestriction	moron, auxiliary metabolic gene and host takeover	10	1	DarB-like antirestriction	moron, auxiliary metabolic gene and host takeover
sporulation stage III protein D	moron, auxiliary metabolic gene and host takeover	9	1	sporulation stage III protein D	moron, auxiliary metabolic gene and host takeover
RexA-like exclusion protein	moron, auxiliary metabolic gene and host takeover	8	1	RexA-like exclusion protein	moron, auxiliary metabolic gene and host takeover
beta-1,4-glycosyltransferase	moron, auxiliary metabolic gene and host takeover	8	1	beta-1,4-glycosyltransferase	moron, auxiliary metabolic gene and host takeover
ADP-ribosyltransferase	moron, auxiliary metabolic gene and host takeover	7	2	ADP-ribosyltransferase	moron, auxiliary metabolic gene and host takeover
RexB-like exclusion protein	moron, auxiliary metabolic gene and host takeover	6	1	RexB-like exclusion protein	moron, auxiliary metabolic gene and host takeover
chitinase	moron, auxiliary metabolic gene and host takeover	6	1	chitinase	moron, auxiliary metabolic gene and host takeover
photosystem II D2	moron, auxiliary metabolic gene and host takeover	6	1	photosystem II D2	moron, auxiliary metabolic gene and host takeover
polysaccharide deacetylase	moron, auxiliary metabolic gene and host takeover	6	2	polysaccharide deacetylase	moron, auxiliary metabolic gene and host takeover
Bxa ADP-ribosyl transferase	moron, auxiliary metabolic gene and host takeover	5	1	Bxa ADP-ribosyl transferase	moron, auxiliary metabolic gene and host takeover
aerobic cobaltochelatase CobT subunit	moron, auxiliary metabolic gene and host takeover	5	1	aerobic cobaltochelatase CobT subunit	moron, auxiliary metabolic gene and host takeover
levanase	moron, auxiliary metabolic gene and host takeover	4	1	levanase	moron, auxiliary metabolic gene and host takeover
ribosomal protein S21	moron, auxiliary metabolic gene and host takeover	4	1	ribosomal protein S21	moron, auxiliary metabolic gene and host takeover
taurine catabolism dioxygenase	moron, auxiliary metabolic gene and host takeover	3	1	taurine catabolism dioxygenase	moron, auxiliary metabolic gene and host takeover
GtrB glycosyltransferase for O-antigen conversion	moron, auxiliary metabolic gene and host takeover	2	1	GtrB glycosyltransferase for O-antigen conversion	moron, auxiliary metabolic gene and host takeover
antitoxin with HTH domain	moron, auxiliary metabolic gene and host takeover	2	1	antitoxin with HTH domain	moron, auxiliary metabolic gene and host takeover
pectin lyase activity	moron, auxiliary metabolic gene and host takeover	2	1	pectin lyase activity	moron, auxiliary metabolic gene and host takeover
photosystem I psaA/psaB protein	moron, auxiliary metabolic gene and host takeover	2	1	photosystem I psaA/psaB protein	moron, auxiliary metabolic gene and host takeover
DNA methyltransferase	other	6996	67	DNA methyltransferase	other
DksA-like zinc-finger protein	other	1285	1	DksA-like zinc-finger protein	other
lipoprotein	other	1165	19	lipoprotein	other
metallo-protease	other	993	1	metallo-protease	other
MazG-like pyrophosphatase	other	983	11	MazG-like pyrophosphatase	other
UvsX-like recombinase	other	931	1	UvsX-like recombinase	other
Lom outer membrane protein	other	847	1	Lom outer membrane protein	other
nucleotide kinase	other	797	8	nucleotide kinase	other
Kil protein for bacterial septation inhibition	other	775	9	Kil protein for bacterial septation inhibition	other
deoxynucleoside monophosphate kinase	other	690	2	deoxynucleoside monophosphate kinase	other
PhoH-like phosphate starvation-inducible	other	648	3	PhoH-like phosphate starvation-inducible	other
polynucleotide kinase	other	612	3	polynucleotide kinase	other
metallo-phosphoesterase	other	601	4	metallo-phosphoesterase	other
peptidase	other	589	26	peptidase	other
high light inducible protein	other	588	3	high light inducible protein	other
cytidyltransferase	other	563	4	cytidyltransferase	other
acetyltransferase	other	521	15	acetyltransferase	other
translation repressor	other	486	2	translation repressor	other
NinI-like serine-threonine phosphatase	other	479	1	NinI-like serine-threonine phosphatase	other
virulence associated	other	466	1	virulence associated	other
Bor-like outer membrane protein	other	463	1	Bor-like outer membrane protein	other
protease	other	461	15	protease	other
secreted protein	other	429	3	secreted protein	other
GTP-binding domain	other	425	1	GTP-binding domain	other
phosphofructokinase	other	424	3	phosphofructokinase	other
deoxyribonucleoside 5' monophosphate phosphatase	other	419	3	deoxyribonucleoside 5' monophosphate phosphatase	other
ATPase	other	390	25	ATPase	other
tail protein with endopeptidase domain	other	378	1	tail protein with endopeptidase domain	other
released from the phage upon host infection	other	377	4	released from the phage upon host infection	other
phosphatase	other	369	2	phosphatase	other
metal-dependent hydrolase	other	321	1	metal-dependent hydrolase	other
nicotinamide phosphoribosyl transferase	other	312	4	nicotinamide phosphoribosyl transferase	other
outer membrane protein	other	309	4	outer membrane protein	other
thymidylate kinase	other	308	5	thymidylate kinase	other
NAD synthetase	other	304	3	NAD synthetase	other
Hsp20 heat shock protein	other	299	1	Hsp20 heat shock protein	other
transaldolase	other	296	1	transaldolase	other
methylamine utilization	other	285	1	methylamine utilization	other
hemolysin	other	284	3	hemolysin	other
DNA transfer protein	other	272	2	DNA transfer protein	other
PetE plastocyanine	other	264	1	PetE plastocyanine	other
phosphoesterase	other	255	2	phosphoesterase	other
nucleotide pyrophosphohydrolase	other	251	3	nucleotide pyrophosphohydrolase	other
methyltransferase	other	249	27	methyltransferase	other
Ig domain containing protein	other	247	5	Ig domain containing protein	other
thymidine kinase	other	236	2	thymidine kinase	other
partition protein ATPase	other	234	2	partition protein ATPase	other
transglycosylase	other	232	18	transglycosylase	other
ribose-phosphate pyrophosphokinase	other	226	1	ribose-phosphate pyrophosphokinase	other
kinase	other	212	14	kinase	other
esterase/lipase	other	208	8	esterase/lipase	other
recombinase	other	206	10	recombinase	other
Na/K ATPase	other	198	1	Na/K ATPase	other
cold shock protein	other	195	1	cold shock protein	other
tail associated cell-wall hydrolase	other	188	1	tail associated cell-wall hydrolase	other
cAMP phosphodiesterase	other	187	2	cAMP phosphodiesterase	other
beta-glucosyl-HMC-alpha-glucosyltransferase	other	171	1	beta-glucosyl-HMC-alpha-glucosyltransferase	other
dehydrogenase	other	167	7	dehydrogenase	other
hydrolase	other	163	18	hydrolase	other
nucleoside triphosphate pyrophosphohydrolase	other	162	3	nucleoside triphosphate pyrophosphohydrolase	DNA, RNA and nucleotide metabolism
ATP-dependent protease	other	156	9	ATP-dependent protease	other
metal-dependent phosphohydrolase	other	154	3	metal-dependent phosphohydrolase	other
nudix hydrolase	other	151	4	nudix hydrolase	other
peptidase HslV family	other	143	1	peptidase HslV family	other
rhodanese-related sulfurtransferase	other	135	2	rhodanese-related sulfurtransferase	other
radical SAM domain-containing protein	other	129	10	radical SAM domain-containing protein	other
MutT/NUDIX hydrolase	other	126	1	MutT/NUDIX hydrolase	other
PblB-type receptor binding	other	125	1	PblB-type receptor binding	other
serine-threonine kinase	other	123	3	serine-threonine kinase	other
SAM-dependent methyltransferase	other	120	4	SAM-dependent methyltransferase	other
glycerophosphoryl diester phosphodiesterase	other	115	5	glycerophosphoryl diester phosphodiesterase	other
peptide methionine sulfoxide reductase	other	115	1	peptide methionine sulfoxide reductase	other
guanylate kinase	other	114	2	guanylate kinase	other
Mom-like DNA modification protein	other	107	1	Mom-like DNA modification protein	other
aminotransferase	other	103	3	aminotransferase	other
spackle periplasmic	other	94	1	spackle periplasmic	other
amidoligase enzyme	other	91	3	amidoligase enzyme	other
GTP cyclohydrolase	other	90	2	GTP cyclohydrolase	other
phosphoribosyl transferase	other	87	3	phosphoribosyl transferase	other
6-phosphofructokinase	other	85	1	6-phosphofructokinase	other
exopolyphosphatase	other	82	1	exopolyphosphatase	other
inhibitor of host Lon protease	other	82	2	inhibitor of host Lon protease	other
lectin	other	80	1	lectin	other
pyrophosphatase	other	78	3	pyrophosphatase	other
hol-like chemotaxis	other	75	4	hol-like chemotaxis	other
hyaluronidase	other	70	3	hyaluronidase	other
protein with Ig domain	other	69	1	protein with Ig domain	other
peroxyredoxin antioxidant	other	66	1	peroxyredoxin antioxidant	other
L-alanyl-D-glutamate peptidase	other	65	1	L-alanyl-D-glutamate peptidase	other
periplasmic protein	other	62	1	periplasmic protein	other
carboxypeptidase	other	61	2	carboxypeptidase	other
zinc containing alcohol dehydrogenase superfamily	other	54	1	zinc containing alcohol dehydrogenase superfamily	other
S-adenosylmethionine decarboxylase	other	52	3	S-adenosylmethionine decarboxylase	other
acetyl-CoA acetyltransferase	other	52	1	acetyl-CoA acetyltransferase	other
co-chaperonin GroES	other	52	2	co-chaperonin GroES	other
RF-1 domain peptide chain release factor	other	50	2	RF-1 domain peptide chain release factor	other
alpha-glucosyltransferase	other	50	1	alpha-glucosyltransferase	other
esterase	other	50	2	esterase	other
glycoside hydrolase	other	50	2	glycoside hydrolase	other
peptide deformylase	other	50	1	peptide deformylase	other
dGTPase inhibitor; target for F exclusion	other	49	1	dGTPase inhibitor; target for F exclusion	other
tryptophan halogenase	other	49	1	tryptophan halogenase	other
tail protein with endopeptidase activity	other	47	1	tail protein with endopeptidase activity	other
zinc-finger domain protein	other	45	9	zinc-finger domain protein	other
O-acetyltransferase	other	43	1	O-acetyltransferase	other
TreN-like membrane protein	other	43	1	TreN-like membrane protein	other
cysteine dioxygenase	other	43	2	cysteine dioxygenase	other
immunity protein	other	40	1	immunity protein	other
6-phosphogluconate dehydrogenase	other	39	1	6-phosphogluconate dehydrogenase	other
L-glutamine-D-fructose-6-phosphate aminotransferase	other	38	2	L-glutamine-D-fructose-6-phosphate aminotransferase	other
COOH.NH2 ligase	other	37	1	COOH.NH2 ligase	other
tail protease	other	34	1	tail protease	other
poly-gamma-glutamate hydrolase	other	33	1	poly-gamma-glutamate hydrolase	other
tRNA methyltransferase	other	32	2	tRNA methyltransferase	other
DHH phosphoesterase	other	31	2	DHH phosphoesterase	other
alpha-2;3-sialyltransferase	other	29	1	alpha-2;3-sialyltransferase	other
zinc carboxypeptidase	other	28	1	zinc carboxypeptidase	other
complement inhibitor	other	27	1	complement inhibitor	other
polynucleotide kinase/phosphorylase	other	27	1	polynucleotide kinase/phosphorylase	other
signal peptide motif	other	27	1	signal peptide motif	other
phosphohydrolase	other	23	5	phosphohydrolase	other
transfer protein	other	23	1	transfer protein	other
chaperonin groEL	other	22	1	chaperonin groEL	other
metallo-endopeptidase	other	21	4	metallo-endopeptidase	other
phosphodiesterase	other	19	4	phosphodiesterase	other
translational regulator	other	19	1	translational regulator	other
ADP-ribosylglycohydrolase	other	18	1	ADP-ribosylglycohydrolase	other
dGTPase inhibitor	other	18	1	dGTPase inhibitor	other
3'-phosphatase, 5'-polynucleotide kinase	other	17	1	3'-phosphatase, 5'-polynucleotide kinase	other
end-filament protein	other	17	1	end-filament protein	other
threonine dehydratase	other	17	1	threonine dehydratase	other
translation elongation factor	other	17	1	translation elongation factor	other
universal stress protein	other	17	1	universal stress protein	other
tail injection transglycosylase	other	16	1	tail injection transglycosylase	other
tetrahydrofolate dehydrogenase and cyclohydrolase	other	16	1	tetrahydrofolate dehydrogenase and cyclohydrolase	other
transmembrane protein	other	16	2	transmembrane protein	other
zinc-finger protease	other	16	1	zinc-finger protease	other
bifunctional heptose 7-phosphate kinase/heptose 1-phosphate adenyltransferase	other	15	1	bifunctional heptose 7-phosphate kinase/heptose 1-phosphate adenyltransferase	other
mazG nucleotide pyrophosphohydrolase	other	15	1	mazG nucleotide pyrophosphohydrolase	other
RecA or Sak4, length ?	other	14	1	RecA or Sak4, length ?	other
aminoacid permease	other	14	1	aminoacid permease	other
lipoprotein precursor	other	14	1	lipoprotein precursor	other
spore protease	other	14	1	spore protease	other
HAD-superfamily hydrolase	other	13	1	HAD-superfamily hydrolase	other
beta-propeller repeat protein	other	13	1	beta-propeller repeat protein	other
lysophospholipase L1-like esterase	other	13	1	lysophospholipase L1-like esterase	other
tail protein with peptidase activity	other	13	1	tail protein with peptidase activity	other
UDP-glucose dehydrogenase	other	12	1	UDP-glucose dehydrogenase	other
cAMP-dependent Kef-type K+ transporter	other	12	2	cAMP-dependent Kef-type K+ transporter	other
dual specificity phosphatase	other	12	2	dual specificity phosphatase	other
hemagglutinin	other	12	1	hemagglutinin	other
radical SAM domain protein	other	12	1	radical SAM domain protein	other
sigma 54 modulation protein/ribosomal protein S30EA	other	12	1	sigma 54 modulation protein/ribosomal protein S30EA	other
sulfatase-modifying factor enzyme	other	11	1	sulfatase-modifying factor enzyme	other
translation initiation factor	other	11	1	translation initiation factor	other
phosphatidylglycerophosphatase A	other	8	1	phosphatidylglycerophosphatase A	other
protein kinase; inhibitor of host transcription; positively regulates RNaseIII; negatively on RNaseE	other	7	2	protein kinase; inhibitor of host transcription; positively regulates RNaseIII; negatively on RNaseE	other
Hsp70 heat shock protein	other	6	1	Hsp70 heat shock protein	other
Fe-S oxidoreductase	other	5	1	Fe-S oxidoreductase	other
nitroreductase	other	4	1	nitroreductase	other
Fe-S-cluster redox domain-containing	other	3	1	Fe-S-cluster redox domain-containing	other
haemolysin-type calcium binding	other	2	1	haemolysin-type calcium binding	other
pseudomurein endosiopeptidase	other	2	1	pseudomurein endosiopeptidase	other
MoxR-like ATPase	other	1	1	MoxR-like ATPase	other
NAD-independent protein deacetylase	other	1	1	NAD-independent protein deacetylase	other
RHH domain	other	1	1	RHH domain	other
cysteine hydrolase	other	1	1	cysteine hydrolase	other
minor tail protein	tail	18431	145	minor tail	tail
tail protein	tail	14066	237	tail	tail
tail length tape measure protein	tail	10195	161	tail length tape measure	tail
baseplate wedge subunit	tail	9696	32	baseplate wedge	tail
tail fiber protein	tail	7972	276	tail fiber	tail
major tail protein	tail	6690	36	major tail	tail
tail assembly chaperone	tail	4455	96	tail assembly	tail
baseplate hub	tail	4030	12	baseplate hub	tail
tail sheath	tail	4019	25	tail sheath	tail
tail assembly protein	tail	3579	14	tail assembly	tail
baseplate spike	tail	2533	1	baseplate spike	tail
distal tail protein Dit	tail	2123	2	distal tail	tail
central tail fiber J	tail	1620	1	tail fiber	tail
tail tube	tail	1484	1	tail tube	tail
tail fiber assembly protein	tail	1374	6	tail fiber assembly	tail
tail fiber assembly	tail	1128	7	tail fiber assembly	tail
tail tube protein	tail	1043	15	tail tube	tail
baseplate protein	tail	907	30	baseplate	tail
tail collar fiber protein	tail	633	8	tail collar	tail
tail chaperone protein	tail	574	1	tail assembly	tail
baseplate hub subunit and tail lysozyme	tail	511	6	baseplate hub	tail
tail sheath stabilizer	tail	497	1	tail sheath stabilizer	tail
baseplate tail tube cap	tail	496	1	baseplate tail tube cap	tail
tail spike protein	tail	491	34	tail spike	tail
Tail assembly chaperone	tail	390	1	tail assembly	tail
baseplate wedge tail fiber protein connector	tail	360	2	tail fiber connector	tail
minor tail protein with lysin activity	tail	326	1	minor tail	tail
tail protein XkdN-like	tail	323	1	tail	tail
RNA ligase and tail fiber protein attachment catalyst	tail	246	1	RNA ligase	DNA, RNA and nucleotide metabolism
tail associated lysin	tail	246	2	tail associated lysin	tail
baseplate hub and tail lysozyme	tail	236	3	baseplate hub	tail
tail fiber protein and host specificity	tail	235	1	tail fiber	tail
baseplate hub assembly catalyst	tail	224	2	baseplate assembly	tail
tail protein with lysin activity	tail	210	4	lytic tail protein	tail
major tail protein with Ig-like domain	tail	179	1	major tail	tail
pilot protein for DNA ejection	tail	168	12	other	tail
tail fiber protein proximal subunit	tail	157	2	tail fiber	tail
fibritin neck whisker	tail	152	2	neck whisker	connector
tail fiber chaperone	tail	151	2	tail fiber assembly	tail
short tail fiber protein	tail	149	5	tail fiber	tail
tail needle knob	tail	144	1	tail needle	tail
long tail fiber protein proximal connector	tail	143	3	tail fiber connector	tail
receptor binding tail protein	tail	137	3	RBP	tail
tail fiber adhesin	tail	137	2	tail fiber	tail
long tail fiber protein distal subunit	tail	132	7	tail fiber	tail
baseplate hub distal subunit	tail	131	1	baseplate hub	tail
tail needle protein	tail	123	1	tail needle	tail
baseplate hub subunit and tail length	tail	116	1	baseplate hub	tail
distal tail protein	tail	114	1	distal tail	tail
tail protein and host specificity	tail	112	3	RBP	tail
hinge connector of long tail fiber protein distal connector	tail	110	2	tail fiber connector	tail
tail fiber protein; host specificity	tail	107	5	tail fiber	tail
tail collar protein	tail	97	6	tail collar	tail
collagen like minor tail	tail	86	2	minor tail	tail
baseplate assembly protein	tail	75	3	baseplate assembly	tail
lytic tail protein	tail	75	1	lytic tail protein	tail
L-shaped tail fiber protein assembly	tail	49	2	tail fiber assembly	tail
tail chaperonin	tail	37	1	tail assembly	tail
base plate tail tube protein	tail	36	1	other	tail
straight fibre tail protein	tail	36	1	tail fiber	tail
EPS depolymerase	tail	32	1	EPS depolymerase	tail
lower collar	tail	27	2	tail collar	tail
baseplate wedge initiator	tail	14	1	baseplate assembly	tail
pentameric base spike protein	tail	14	1	tail spike	tail
tail appendage	tail	14	1	tail appendage	tail
tail spike protein with colonic acid degradation activity	tail	14	1	tail spike	tail
lytic tail fiber protein	tail	13	3	tail fiber	tail
tail fiber protein/ lysozyme	tail	13	2	tail fiber	tail
capsid assembly protein	tail	12	1	capsid assembly	head and packaging
tail tubular protein	tail	12	1	tail tubular protein	tail
tail fiber protein; Ig-domain containing	tail	8	1	tail fiber	tail
tail sheath and receptor binding protein	tail	6	1	other	tail
Gpu-like tail protein	tail	5	1	tail protein	tail
adhesin	tail	5	1	adhesin	tail
collar tail protein for L-shaped tail fibre attachment	tail	2	1	tail collar	tail
tail length tape measure protein chaperone	tail	2	1	other	tail
transcriptional regulator	transcription regulation	11008	127	transcriptional regulator	transcription regulation
transcriptional repressor	transcription regulation	10797	57	transcriptional repressor	transcription regulation
anti-repressor Ant	transcription regulation	3307	11	anti-repressor	transcription regulation
anti-termination protein Q-like	transcription regulation	2564	8	anti-termination protein	transcription regulation
CII-like transcriptional activator	transcription regulation	2125	5	transcriptional activator	transcription regulation
Arc-like repressor	transcription regulation	1398	13	Arc-like repressor	transcription regulation
anti-repressor	transcription regulation	1276	28	anti-repressor	transcription regulation
transcriptional activator	transcription regulation	820	5	transcriptional activator	transcription regulation
RNA polymerase sigma factor	transcription regulation	746	13	RNA polymerase	DNA, RNA and nucleotide metabolism
RinB-like transcriptional activator	transcription regulation	638	2	transcriptional activator	transcription regulation
late sigma transcription factor	transcription regulation	489	1	transcriptional factor	transcription regulation
late promoter transcriptional regulator	transcription regulation	476	3	transcriptional regulator	transcription regulation
anti-termination protein N-like	transcription regulation	446	1	anti-termination protein	transcription regulation
late transcriptional activator	transcription regulation	440	3	transcriptional activator	transcription regulation
transcriptional regulator, D5-like	transcription regulation	379	1	transcriptional regulator	transcription regulation
sigma-K factor	transcription regulation	353	1	sigma-K factor	transcription regulation
WhiB transcriptional factor	transcription regulation	284	1	WhiB transcriptional factor	transcription regulation
Rha-like transcriptional regulator	transcription regulation	262	1	transcriptional regulator	transcription regulation
CIII anti-termination	transcription regulation	253	3	anti-termination protein	transcription regulation
CII-like regulator	transcription regulation	226	3	CII-like regulator	transcription regulation
starvation-inducible transcriptional regulator	transcription regulation	168	1	transcriptional regulator	transcription regulation
transcriptional regulator WhiB-like	transcription regulation	157	12	transcriptional factor	transcription regulation
FmdB-like transcriptional regulator	transcription regulation	139	1	FmdB-like transcriptional regulator	transcription regulation
inhibitor of host transcription	transcription regulation	126	3	inhibitor of host transcription	transcription regulation
Mrh transcription modulator under heat shock	transcription regulation	122	1	Mrh transcription modulator under heat shock	transcription regulation
sigma factor	transcription regulation	120	4	sigma factor	transcription regulation
MotA-like activator of middle period transcription	transcription regulation	111	1	MotA-like activator of middle period transcription	transcription regulation
MotB-like transcriptional regulator	transcription regulation	107	2	transcriptional regulator	transcription regulation
MarR family transcrition regulator	transcription regulation	89	1	transcriptional regulator	transcription regulation
Lpa-like transcriptional activator	transcription regulation	88	1	transcriptional activator	transcription regulation
Alt-like transcription activator	transcription regulation	68	1	transcriptional activator	transcription regulation
MerR-like transcriptional regulator	transcription regulation	60	1	transcriptional regulator	transcription regulation
Arc-like DNA binding domain	transcription regulation	45	1	DNA binding domain	transcription regulation
transcription factor	transcription regulation	40	4	transcriptional factor	transcription regulation
CI-like repressor	transcription regulation	31	3	transcriptional repressor	transcription regulation
CsrA-like regulator	transcription regulation	24	2	transcriptional regulator	transcription regulation
Nun-like transcription termination factor	transcription regulation	23	1	Nun-like transcription termination factor	transcription regulation
transcription antiterminator	transcription regulation	23	3	transcription antiterminator	transcription regulation
Arc-like transcriptional regulator	transcription regulation	17	2	Arc-like transcriptional regulator	transcription regulation
CopG-like transcriptional repressor	transcription regulation	16	1	CopG-like transcriptional repressor	transcription regulation
cro-like repressor	transcription regulation	8	2	cro-like repressor	transcription regulation
sigma factor for late transcription	transcription regulation	8	1	sigma factor for late transcription	transcription regulation
inhibitor of transcription initiation and antiterminator	transcription regulation	3	1	inhibitor of transcription initiation and antiterminator	transcription regulation
